# Supplementary material
Source: ML conference proceedings conference paper supplement (https://aclanthology.org/2026.americasnlp-6.25)
Supplement: SupplementaryMaterial [file fig1_base_vs_ft.pdf › latex/img/fig1_base_vs_ft.pdf]

■ Base NLLB-200 ■ Fine-tuned (submitted)

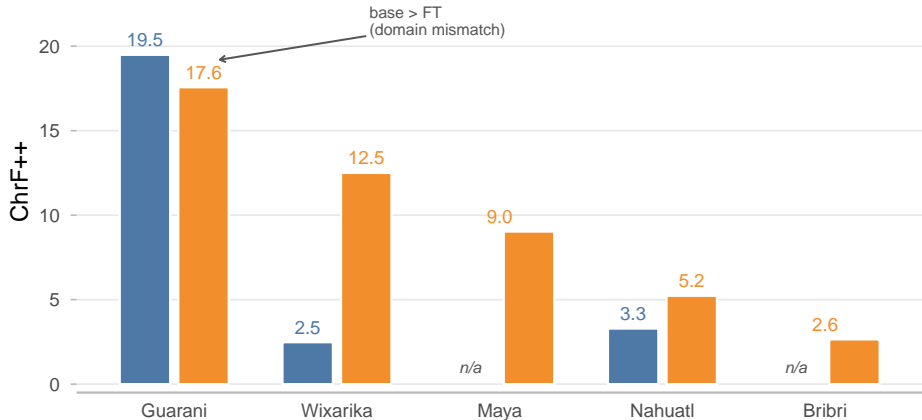

*n/a = NLLB-200 has no vocabulary entry for this language (produces English silently)*
