# Supplementary material
Source: ML conference proceedings conference paper supplement (https://aclanthology.org/2026.americasnlp-6.25)

Dev ChrF++ (fine-tuned model)

20

15

10

5

0

0

10

20

30

40

50

Training pairs (thousands)

Guarani

Wixarika

Maya

Bribri

Nahuatl

domain mismatch:  
news text != image captions

*Nahuatl (36k pairs) scores lower than Wixarika (16k): domain matters more than volume.*

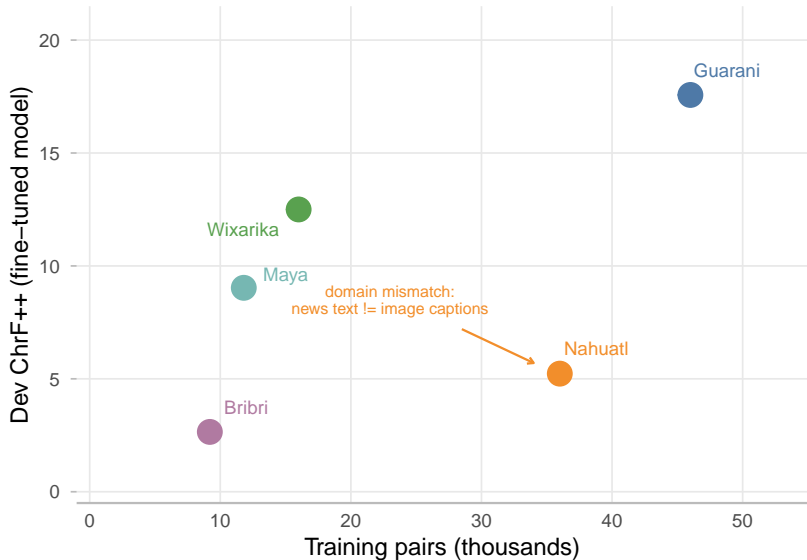

Supplement: SupplementaryMaterial [file fig3_data_vs_score.pdf › latex/img/fig3_data_vs_score.pdf]
