# Supplementary material
Source: ML conference proceedings conference paper supplement (https://aclanthology.org/2026.americasnlp-6.25)

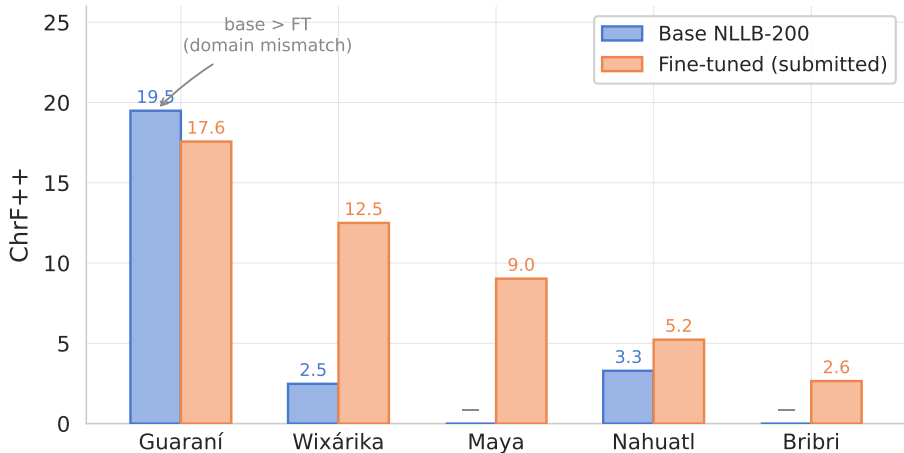

— = not applicable (vocabulary gap in base model)

Supplement: SupplementaryMaterial [file fig1_base_vs_ft_2.pdf › latex/img/fig1_base_vs_ft_2.pdf]
